# Supplementary material
Source: publisher figshare collection journal article supplement (https://gsajournals.figshare.com/ndownloader/files/15684884)
Supplement: Supplementary file 1 [file 15684884]

## Sheet: Linkage groups
Table S3.1. F6 Rusty x PI 192051-1 genetic map features
Linkage groups	Number of markers/ Linkage group	Number of unique loci / Linkage group	length of Linkage group (cM)	Average density (cM/locus)	Number of markers in segreagtion distortion (Chi-square test - Seg 1:1, p value <0.01)
1A	94	30	138.5	4.6	0
1B	64	36	100.5	2.8	0
2A-1	16	5	9.1	1.8	0
2A-2	39	25	101.7	4.1	1
2B	76	31	108.1	3.5	34
3A-1	16	7	16.7	2.4	0
3A-2	52	22	83.8	4	5
3B-1	21	13	25.4	2	0
3B-2	64	22	43.5	2	49
4A	87	17	103.9	6.1	0
4B	53	21	66.5	3.2	0
5A-1	44	18	57.9	3.2	0
5A-2	23	7	34.6	4.9	3
5B	107	56	150.4	2.7	2
6A-1	44	15	59.5	4	0
6A-2	41	13	11.3	0.9	6
6B	87	30	107	3.5	69
7A-1	16	5	2.8	0.6	1
7A-2	68	33	117.9	3.6	6
7B	96	43	97.3	2.3	0
Total	1108	449	1436.4	3.11	176

## Sheet: markers with seg. distortion
Table S3.2 List of markers showing segregation distortion from 1:1 using chisqure test (P value <0.01)
Marker	Linkage group	c21:1	p
IWA3848	2A-2	9.25641	0.00234686
IWA5087	2B	15.2105	9.62042e-05
IWA7916	2B	10.2558	0.00136267
IWA4421	2B	8.49412	0.0035631
IWA8083	2B	10.0659	0.00151054
IWA2556	2B	14.3678	0.0001504
IWA5560	2B	12.1609	0.000488104
IWA4456	2B	9.91011	0.00164386
IWA2557	2B	11.4407	0.000718641
IWA3824	2B	14.2045	0.000164026
IWA1114	2B	14.2045	0.000164026
IWA8046	2B	14.8629	0.00011566
IWA762	2B	15.5402	8.08024e-05
IWA2887	2B	17.0904	3.56624e-05
IWA1664	2B	17.4855	2.89676e-05
IWA3564	2B	15.0347	0.000105594
IWA4532	2B	17.6901	2.60146e-05
IWA763	2B	17.1529	3.45074e-05
IWA4720	2B	11.3882	0.000739214
IWA4531	2B	8.79191	0.00302583
IWA295	2B	10.5	0.00119387
IWA3515	2B	9.52381	0.00202837
IWA2624	2B	8.20455	0.00417869
IWA6838	2B	9.09091	0.00256897
IWA2673	2B	7.24852	0.00709604
IWA50	2B	6.88095	0.00871199
IWA6547	2B	7.91329	0.0049074
IWA4189	2B	6.88095	0.00871199
IWA5658	2B	12.1609	0.000488104
IWA5256	2B	7.91329	0.0049074
IWA5168	2B	7.80723	0.00520388
IWA697	2B	8.1976	0.0041947
IWA1036	2B	6.68098	0.00974476
IWA2512	2B	11.8876	0.000565173
IWA68	2B	8.89474	0.00286008
IWA5284	3A-2	6.9209	0.00851947
IWA1678	3A-2	7.2809	0.00696926
IWA1319	3A-2	8.59322	0.0033743
IWA3198	3A-2	7.82286	0.00515908
IWA3544	3A-2	8.59524	0.00337057
IWA186	3B-2	7.51534	0.00611769
IWA7285	3B-2	7.51534	0.00611769
IWA6165	3B-2	7.51534	0.00611769
IWA7860	3B-2	8.6988	0.00318434
IWA5396	3B-2	8.6988	0.00318434
IWA4755	3B-2	10.8129	0.00100809
IWA4310	3B-2	12.6229	0.000381139
IWA6202	3B-2	13.0909	0.000296804
IWA6201	3B-2	11.2558	0.00079385
IWA4226	3B-2	9.41176	0.00215611
IWA5925	3B-2	6.88095	0.00871199
IWA7004	3B-2	10.9408	0.000940797
IWA682	3B-2	13.72	0.000212243
IWA5977	3B-2	8.80488	0.0030044
IWA6633	3B-2	14.2222	0.000162493
IWA5770	3B-2	10.9408	0.000940797
IWA6655	3B-2	13.7205	0.000212187
IWA6422	3B-2	9.94675	0.00161147
IWA3504	3B-2	17.1139	3.52234e-05
IWA8480	3B-2	14.3772	0.000149649
IWA7595	3B-2	15.8228	6.95912e-05
IWA4452	3B-2	11.2061	0.000815417
IWA6794	3B-2	15.8228	6.95912e-05
IWA6677	3B-2	17.4472	2.95577e-05
IWA6793	3B-2	22.6118	1.98511e-06
IWA1449	3B-2	23.1566	1.49523e-06
IWA3383	3B-2	33.8	6.12706e-09
IWA5886	3B-2	19.8481	8.39191e-06
IWA7905	3B-2	19.8481	8.39191e-06
IWA1898	3B-2	13.7143	0.00021289
IWA611	3B-2	17.7805	2.48071e-05
IWA3218	3B-2	31.1136	2.43995e-08
IWA610	3B-2	21.025	4.53791e-06
IWA3245	3B-2	25.6235	4.15645e-07
IWA5869	3B-2	28.1716	1.11255e-07
IWA7516	3B-2	33.1954	8.35992e-09
IWA7225	3B-2	33.9765	5.59597e-09
IWA1196	3B-2	30.1073	4.09778e-08
IWA7745	3B-2	30.4514	3.43188e-08
IWA1148	3B-2	31.4246	2.07896e-08
IWA3046	3B-2	16.237	5.59193e-05
IWA7221	3B-2	14.3678	0.0001504
IWA2661	3B-2	14.3678	0.0001504
IWA7087	3B-2	14.5349	0.000137636
IWA2063	3B-2	12.9438	0.000321054
IWA4906	3B-2	8.00585	0.00466278
IWA3669	3B-2	8.00585	0.00466278
IWA5871	3B-2	8.49412	0.0035631
IWA2167	3B-2	8.00585	0.00466278
IWA5002	5A-2	8.11236	0.00439657
IWA5003	5A-2	8.11236	0.00439657
IWA3391	5A-2	6.84358	0.00889613
IWA7310	5B	7	0.00815105
IWA1390	5B	11.1264	0.000851171
IWA2527	6A-2	6.84358	0.00889613
IWA3205	6A-2	8.88889	0.00286925
IWA3203	6A-2	8.88889	0.00286925
IWA3204	6A-2	8.49721	0.00355706
IWA1096	6A-2	31.5077	1.99188e-08
IWA1866	6A-2	8.02222	0.00462081
IWA4610	6B	6.8	0.00911586
IWA5857	6B	10.8129	0.00100809
IWA5943	6B	10.2558	0.00136267
IWA3991	6B	10.2558	0.00136267
IWA2375	6B	25.6889	4.01808e-07
IWA6953	6B	29.5181	5.55271e-08
IWA6494	6B	39.2	3.84168e-10
IWA2439	6B	39.2	3.84168e-10
IWA206	6B	42.2515	8.06555e-11
IWA4730	6B	41.763	1.03531e-10
IWA3676	6B	57.6328	3.19744e-14
IWA7896	6B	56.8182	4.81837e-14
IWA2307	6B	51.3721	7.69607e-13
IWA7786	6B	57.6328	3.19744e-14
IWA2975	6B	59.9379	9.76996e-15
IWA6958	6B	57.6328	3.19744e-14
IWA3450	6B	87.3636	0
IWA2244	6B	87.4509	0
IWA1151	6B	91.1243	0
IWA3917	6B	95.0914	0
IWA5966	6B	97.1264	0
IWA4848	6B	96.1908	0
IWA7574	6B	99.1965	0
IWA2134	6B	98.2558	0
IWA7818	6B	91.6909	0
IWA4169	6B	71.2197	0
IWA6101	6B	80.0952	0
IWA4924	6B	79.1916	0
IWA5504	6B	89.8221	0
IWA1839	6B	87.8049	0
IWA5029	6B	81.9701	0
IWA3652	6B	101.08	0
IWA8184	6B	102.966	0
IWA2780	6B	101.816	0
IWA5102	6B	103.91	0
IWA4170	6B	105.8	0
IWA997	6B	105.8	0
IWA3797	6B	105.8	0
IWA3796	6B	105.8	0
IWA1838	6B	105.8	0
IWA7628	6B	106.299	0
IWA5346	6B	96.8049	0
IWA8165	6B	104.395	0
IWA5345	6B	105.347	0
IWA4287	6B	112.022	0
IWA1251	6B	102.023	0
IWA4503	6B	102.023	0
IWA4500	6B	94.9438	0
IWA4502	6B	100.138	0
IWA4501	6B	90.7561	0
IWA5722	6B	66.9532	2.22045e-16
IWA6329	6B	64.5747	8.88178e-16
IWA683	6B	55.8372	7.92699e-14
IWA3699	6B	46.7853	7.96785e-12
IWA221	6B	49.2093	2.3157e-12
IWA5148	6B	49.9942	1.55231e-12
IWA4959	6B	49.2093	2.3157e-12
IWA4337	6B	49.9942	1.55231e-12
IWA967	6B	37.0976	1.12792e-09
IWA308	6B	39.2874	3.67353e-10
IWA307	6B	40.506	1.96901e-10
IWA1666	6B	41.0889	1.4614e-10
IWA1628	6B	37.9249	7.38154e-10
IWA1629	6B	31.8372	1.68113e-08
IWA5605	6B	14.5515	0.000136426
IWA4919	6B	9.71676	0.00182608
IWA4245	6B	9.71676	0.00182608
IWA824	6B	12.2727	0.000459714
IWA1233	6B	6.72093	0.00952886
IWA3978	7A-1	8.00585	0.00466278
IWA8390	7A-2	11.3882	0.000739214
IWA1805	7A-2	15.0347	0.000105594
IWA2507	7A-2	8.1976	0.0041947
IWA6331	7A-2	7.80723	0.00520388
IWA2905	7A-2	7.64804	0.0056835
IWA2929	7A-2	8.88889	0.00286925
